# Supplementary material for: Re-sequencing Expands Our Understanding of the Phenotypic Impact of Variants at GWAS Loci
Source: PLOS journal article supplement (doi:10.1371/journal.pgen.1004147), 2014-01-30

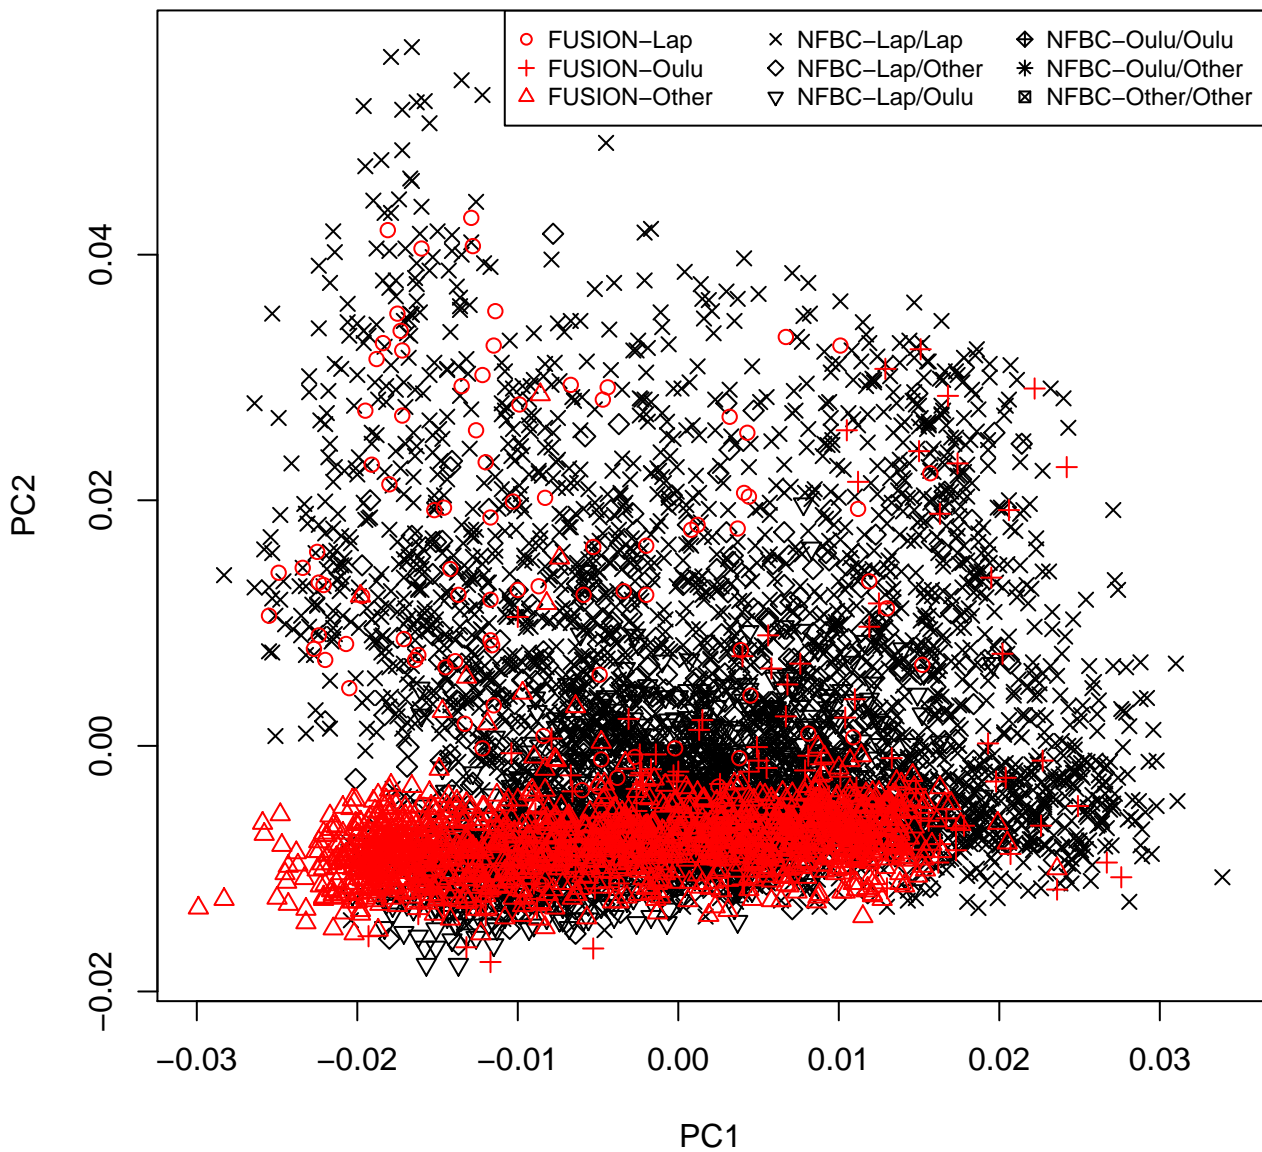

Supplement: S1 (10.1371/journal.pgen.1004147.s001) [file journal.pgen.1004147.s001]
