# Supplementary material for: Re-sequencing Expands Our Understanding of the Phenotypic Impact of Variants at GWAS Loci
Source: PLoS Genet. 2014 Jan 30;10(1):e1004147. doi: 10.1371/journal.pgen.1004147 (PMC3907339; doi:10.1371/journal.pgen.1004147)
Supplement: Table S1 — Comparison of phenotypic values for NFBC participants and FUSION cases and controls. (XLS) [file pgen.1004147.s007.xls]

## Sheet: Sheet1
Supplementary Table 1. Comparison of phenotypic values for NFBC participants and FUSION cases and controls.
Phenotype abbreviations: TG = triglycerides; TC = total cholesterol; LDL-C = low density liproprotein cholesterol;
HDL-C = high density lipoprotein cholesterol; BMI = body mass index; FG = fasting glucose; FI = fasting insulin;
BP.SYS = systolic blood pressure; BP.DIA = diastolic blood pressure; HT = height, WHR = waist-hip ratio
	Males						Females
	n	min	mean	median	sd	max	n	min	mean	median	sd	max
TG (mmol/l)
NFBC	2394	0.19	1.33576	1.11	0.83258	12.01	2676	0.31	1.05414	0.9	0.570791	5.59
FUSION cases	500	0.49	2.32648	1.78	1.97953	17.24	360	0.55	2.20986	1.845	1.50269	16.9
FUSION controls	464	0.4	1.41825	1.23	0.766886	6.75	432	0.39	1.25917	1.13	0.550426	4.33
TC (mmol/l)
NFBC	2387	1.9	5.21482	5.13	1.01668	11.36	2670	1.9	4.96553	4.84	0.987097	10.16
FUSION cases	500	3	5.65894	5.47	1.31784	15.21	360	2.98	5.80875	5.665	1.16019	12.3
FUSION controls	469	3.09	5.65623	5.64	0.968939	8.78	434	3.34	5.88585	5.845	0.962228	8.97
LDL-C (mmol/l)
NFBC	2387	0.4	3.22923	3.1	0.905887	9.1	2670	0.5	2.81539	2.7	0.828971	7.8
FUSION cases	463	1.1005	3.56108	3.399	1.06014	10.9965	342	1.5235	3.57602	3.5065	0.982095	7.59
FUSION controls	460	1.41	3.66576	3.61625	0.864563	6.411	431	1.0745	3.61409	3.5205	0.895017	6.239
HDL-C (mmol/l)
NFBC	2395	0.34	1.41208	1.37	0.328328	4.3	2676	0.66	1.69656	1.67	0.380754	3.11
FUSION cases	500	0.5	1.11216	1.07	0.301219	2.37	360	0.54	1.25475	1.2	0.357793	2.97
FUSION controls	469	0.31	1.3551	1.31	0.358076	3.07	434	0.78	1.69387	1.675	0.415216	3.16
BMI (kg/m2)
NFBC	2504	15.323	25.2072	24.8846	3.60379	47.5756	2536	15.4321	24.1961	23.1553	4.75734	54.3491
FUSION cases	507	18.1855	29.3884	29.02	4.01373	43.1405	362	16.0004	31.082	30.7096	5.14959	47.5852
FUSION controls	476	19.37	27.0482	26.7519	3.55991	51.0749	441	16.937	27.1223	26.6728	4.24714	45.9028
FG (mmol/l)
NFBC	2371	3.8	5.15407	5.1	0.428996	6.8	2471	3.7	4.90538	4.9	0.400454	6.8
FUSION cases	488	4.13	9.54811	8.65	3.14539	22.2	349	4.33	9.38074	8.35	3.11119	20.08
FUSION controls	462	3	5.4723	5.52	0.433665	6.09	434	3.8	5.25609	5.27672	0.444733	6.08
FI (pmol/l)
NFBC	2339	17.4	50.2386	46.2	18.8191	139.8	2449	17.4	47.4556	43.8	17.3524	141.6
FUSION cases	485	6	102.784	89.4	67.087	480	345	6	113.563	97.2	69.6156	514.8
FUSION controls	468	6	51.709	44.4	31.1376	240	434	6	57.535	48	39.9167	430.2
BP.SYS (mm Hg)
NFBC	2529	91	130.298	129	12.7286	204	2763	82	119.884	118	12.2687	195
FUSION cases	508	93.5	150.693	149	21.193	211	363	96	153.831	151	23.2556	237
FUSION controls	476	96	140.028	140	17.933	187	441	101	142.433	140	19.7539	214
BP.DIA (mm Hg)
NFBC	2528	38	80.393	80	11.4115	121	2756	0	74.6386	74	10.9129	122
FUSION cases	508	39	85.5335	86	11.2291	121	363	56	82.1446	82	10.4882	129.5
FUSION controls	476	54	81.7815	82	10.0811	112	441	55	80.8537	80	10.1024	114
HT (cm)
NFBC	2541	152	178.208	178.1	6.41082	202.6	2778	105.4	164.726	164.5	6.21767	186.8
FUSION cases	503	152.4	173.024	173	6.01638	192	359	140	159.406	159.1	5.648	176
FUSION controls	473	156	173.562	173.6	6.22185	190.6	441	144	160.246	160	5.95469	179
WHR
NFBC	2521	0.607843	0.910836	0.906931	0.0587017	1.22881	2608	0.434043	0.810188	0.794872	0.0788206	1.70866
FUSION cases	507	0.821429	0.992837	0.99	0.0650903	1.24242	357	0.693694	0.895188	0.890476	0.0699931	1.21
FUSION controls	462	0.626316	0.963467	0.964125	0.0609898	1.09953	414	0.672897	0.837988	0.83595	0.0599749	1.06667
Age (years)
NFBC	31	31	31	31	31	31	31	31	31	31	31	31
FUSION cases	532	40.8	62.5	63	7.3	77.8	387	42.8	64.1	64.6	8.1	83.7
FUSION controls	477	46	64	65	7.3	90.9	442	42.6	63.9	65	7.3	80.9
