# Supplementary material for: Re-sequencing Expands Our Understanding of the Phenotypic Impact of Variants at GWAS Loci
Source: PLoS Genet. 2014 Jan 30;10(1):e1004147. doi: 10.1371/journal.pgen.1004147 (PMC3907339; doi:10.1371/journal.pgen.1004147)
Supplement: Table S5 — Results of all gene-level tests of rare variants in genes that are found in regions of a priori association to the indicated phenotype. (XLS) [file pgen.1004147.s011.xls]

## Sheet: Sheet1
Supplementary Table 5. Results of all gene-level tests of rare variants in genes that are found in regions of a priori association to the indicated phenotype
P-values for CMC (Li & Leal 2008) were determined empirically with 10,000 permutations
P-values for SKAT (Wu 2011) were determined using asymptotic theory
Phenotype abbreviations and locus identifiers are as in Table S1
Locus	Gene	Phenotype	CMC	SKAT
CELSR2	ATXN7L2	LDL-C	0.7656	0.962371
	CELSR2	LDL-C	0.826	0.807317
	KIAA1324	LDL-C	0.356	0.358514
	MYBPHL	LDL-C	0.9038	0.8815
	PSRC1	LDL-C	0.6898	0.313594
	SARS	LDL-C	0.3718	0.267428
	SORT1	LDL-C	0.3072	0.280896
	SYPL2	LDL-C	0.6208	0.980579
	ATXN7L2	TC	0.7053	0.909769
	CELSR2	TC	0.6849	0.799211
	KIAA1324	TC	0.359	0.372987
	MYBPHL	TC	0.8312	0.876229
	PSRC1	TC	0.5652	0.291223
	SARS	TC	0.399	0.247326
	SORT1	TC	0.2916	0.240342
	SYPL2	TC	0.225	0.725623
GALNT2	GALNT2	HDL-C	0.3148	0.731783
	GALNT2	TG	0.403	0.792608
GCKR	GCKR	FG	0.687	0.993804
	GCKR	TC	0.2239	0.308082
	GCKR	TG	0.0516	0.0203271
ABCG8	ABCG5	LDL-C	0.0091	0.00255643
	ABCG8	LDL-C	0.6843	0.251884
	LRPPRC	LDL-C	0.5643	0.986711
	PLEKHH2	LDL-C	0.8902	0.627972
	THADA	LDL-C	0.8331	0.410403
	ABCG5	TC	0.0859	0.041244
	ABCG8	TC	0.388	0.444935
	LRPPRC	TC	0.4008	0.755888
	PLEKHH2	TC	0.9392	0.516646
	THADA	TC	0.9513	0.492056
G6PC2	ABCB11	FG	0.1396	0.220183
	G6PC2	FG	0.6927	0.048309
	LASS6	FG	0.7253	0.434724
	NOSTRIN	FG	0.5898	0.822327
LPL	LPL	HDL-C	0.6146	0.842709
	LPL	TG	0.0954	0.159095
ABCA1	ABCA1	HDL-C	0.0005	0.00325007
	ABCA1	TC	3.7e-05	0.0175552
PANK1	PANK1	FI	0.6361	0.70032
CRY2	MAPK8IP1	FG	0.6248	0.737826
	SLC35C1	FG	0.4935	0.205727
MADD	ACP2	FG	0.6794	0.865998
	ARFGAP2	FG	0.2143	0.781999
	C11orf49	FG	0.5917	0.276632
	CKAP5	FG	0.8133	0.269472
	DDB2	FG	0.1784	0.253106
	LRP4	FG	0.1671	0.940529
	MADD	FG	0.1095	0.277173
	MYBPC3	FG	0.4528	0.251579
	NR1H3	FG	0.4319	0.452058
	PACSIN3	FG	0.8644	0.937773
	RAPSN	FG	0.1597	0.178554
	SLC39A13	FG	0.2922	0.0688021
	ACP2	HDL-C	0.5963	0.594993
	ARFGAP2	HDL-C	0.5969	0.987892
	C11orf49	HDL-C	0.525	0.152052
	CKAP5	HDL-C	0.1244	0.0868117
	DDB2	HDL-C	0.6765	0.0891814
	LRP4	HDL-C	0.4782	0.89233
	MADD	HDL-C	0.5069	0.65068
	MYBPC3	HDL-C	0.2955	0.398822
	NR1H3	HDL-C	0.1203	0.194307
	PACSIN3	HDL-C	0.0031	0.00782189
	RAPSN	HDL-C	0.5231	0.769905
	SLC39A13	HDL-C	0.2177	0.464076
FADS1	FADS2	FG	0.8756	1
	FADS2	HDL-C	0.6964	0.916938
	FADS2	LDL-C	0.7318	0.711523
	FADS2	TC	0.8041	0.794195
	FADS2	TG	0.6094	1
MTNR1B	MTNR1B	FG	0.131	0.409019
APOA1	APOA4	HDL-C	0.0566	0.0258638
	APOA5	HDL-C	0.0106	0.205662
	APOA4	LDL-C	0.5497	0.928634
	APOA5	LDL-C	0.634	0.617792
	APOA4	TC	0.1712	0.611016
	APOA5	TC	0.576	0.328957
	APOA4	TG	0.225	0.290427
	APOA5	TG	0.0115	0.0859938
MVK	MVK	HDL-C	0.5085	0.0216279
LIPC	LIPC	HDL-C	0.8416	0.700578
	LIPC	TC	0.904	0.145297
	LIPC	TG	0.6871	0.0465509
CETP	CETP	HDL-C	0.0041	0.000644335
	HERPUD1	HDL-C	0.4223	0.676972
	NLRC5	HDL-C	0.1588	0.148389
	NUP93	HDL-C	0.3653	0.850176
	SLC12A3	HDL-C	0.1642	0.296606
	CETP	LDL-C	0.1329	0.315144
	HERPUD1	LDL-C	0.382	0.612186
	NLRC5	LDL-C	0.6767	0.19061
	NUP93	LDL-C	0.1279	0.398846
	SLC12A3	LDL-C	0.5357	0.521447
	CETP	TC	0.0213	0.0184765
	HERPUD1	TC	0.397	0.61608
	NLRC5	TC	0.8926	0.189658
	NUP93	TC	0.1937	0.642075
	SLC12A3	TC	0.7981	0.911095
	CETP	TG	0.9314	0.741831
	HERPUD1	TG	0.5549	0.671572
	NLRC5	TG	0.3323	0.845997
	NUP93	TG	0.0495	0.529223
	SLC12A3	TG	0.3641	0.304532
NCAN	ATP13A1	LDL-C	0.5497	0.510376
	CILP2	LDL-C	0.3226	0.0658695
	GATAD2A	LDL-C	0.0439	0.156768
	GMIP	LDL-C	0.7633	0.275178
	HAPLN4	LDL-C	0.6999	0.947048
	MEF2B	LDL-C	0.1533	0.0473131
	NCAN	LDL-C	0.1639	0.81039
	PBX4	LDL-C	0.828	0.978712
	RFXANK	LDL-C	0.1332	0.026783
	SF4	LDL-C	0.1783	0.309384
	TM6SF2	LDL-C	0.0866	0.0118777
	TSSK6	LDL-C	0.1554	0.253128
	ZNF101	LDL-C	0.4238	0.282395
	ZNF14	LDL-C	0.1369	0.187777
	ATP13A1	TC	0.8867	0.318166
	CILP2	TC	0.5793	0.294702
	GATAD2A	TC	0.039	0.114878
	GMIP	TC	0.8776	0.147226
	HAPLN4	TC	0.5323	0.922428
	MEF2B	TC	0.3076	0.178053
	NCAN	TC	0.389	0.841921
	PBX4	TC	0.6893	0.797056
	RFXANK	TC	0.1756	0.0433932
	SF4	TC	0.305	0.393969
	TM6SF2	TC	0.1121	0.0272821
	TSSK6	TC	0.2932	0.512977
	ZNF101	TC	0.412	0.192437
	ZNF14	TC	0.2357	0.406259
	ATP13A1	TG	0.4326	0.729308
	CILP2	TG	0.3414	0.239702
	GATAD2A	TG	0.6659	0.849414
	GMIP	TG	0.365	0.986279
	HAPLN4	TG	0.6194	0.955937
	LPAR2	TG	0.031	0.0073133
	MEF2B	TG	0.8572	0.492453
	NCAN	TG	0.5413	0.599104
	PBX4	TG	0.869	0.703803
	RFXANK	TG	0.8253	0.899896
	SF4	TG	0.5308	0.690495
	TM6SF2	TG	0.0802	0.100106
	TSSK6	TG	0.215	0.37154
	ZNF101	TG	0.7836	0.759311
	ZNF14	TG	0.2158	0.381372
